# Supplementary material
Source: Springer Nature journal article supplement (https://www.springermedizin.de/resource/supplementary/12936_2010_1747_MOESM3_ESM.pdf/9541602)

# Buffer effect of pH regulator containing ASAQ tablets

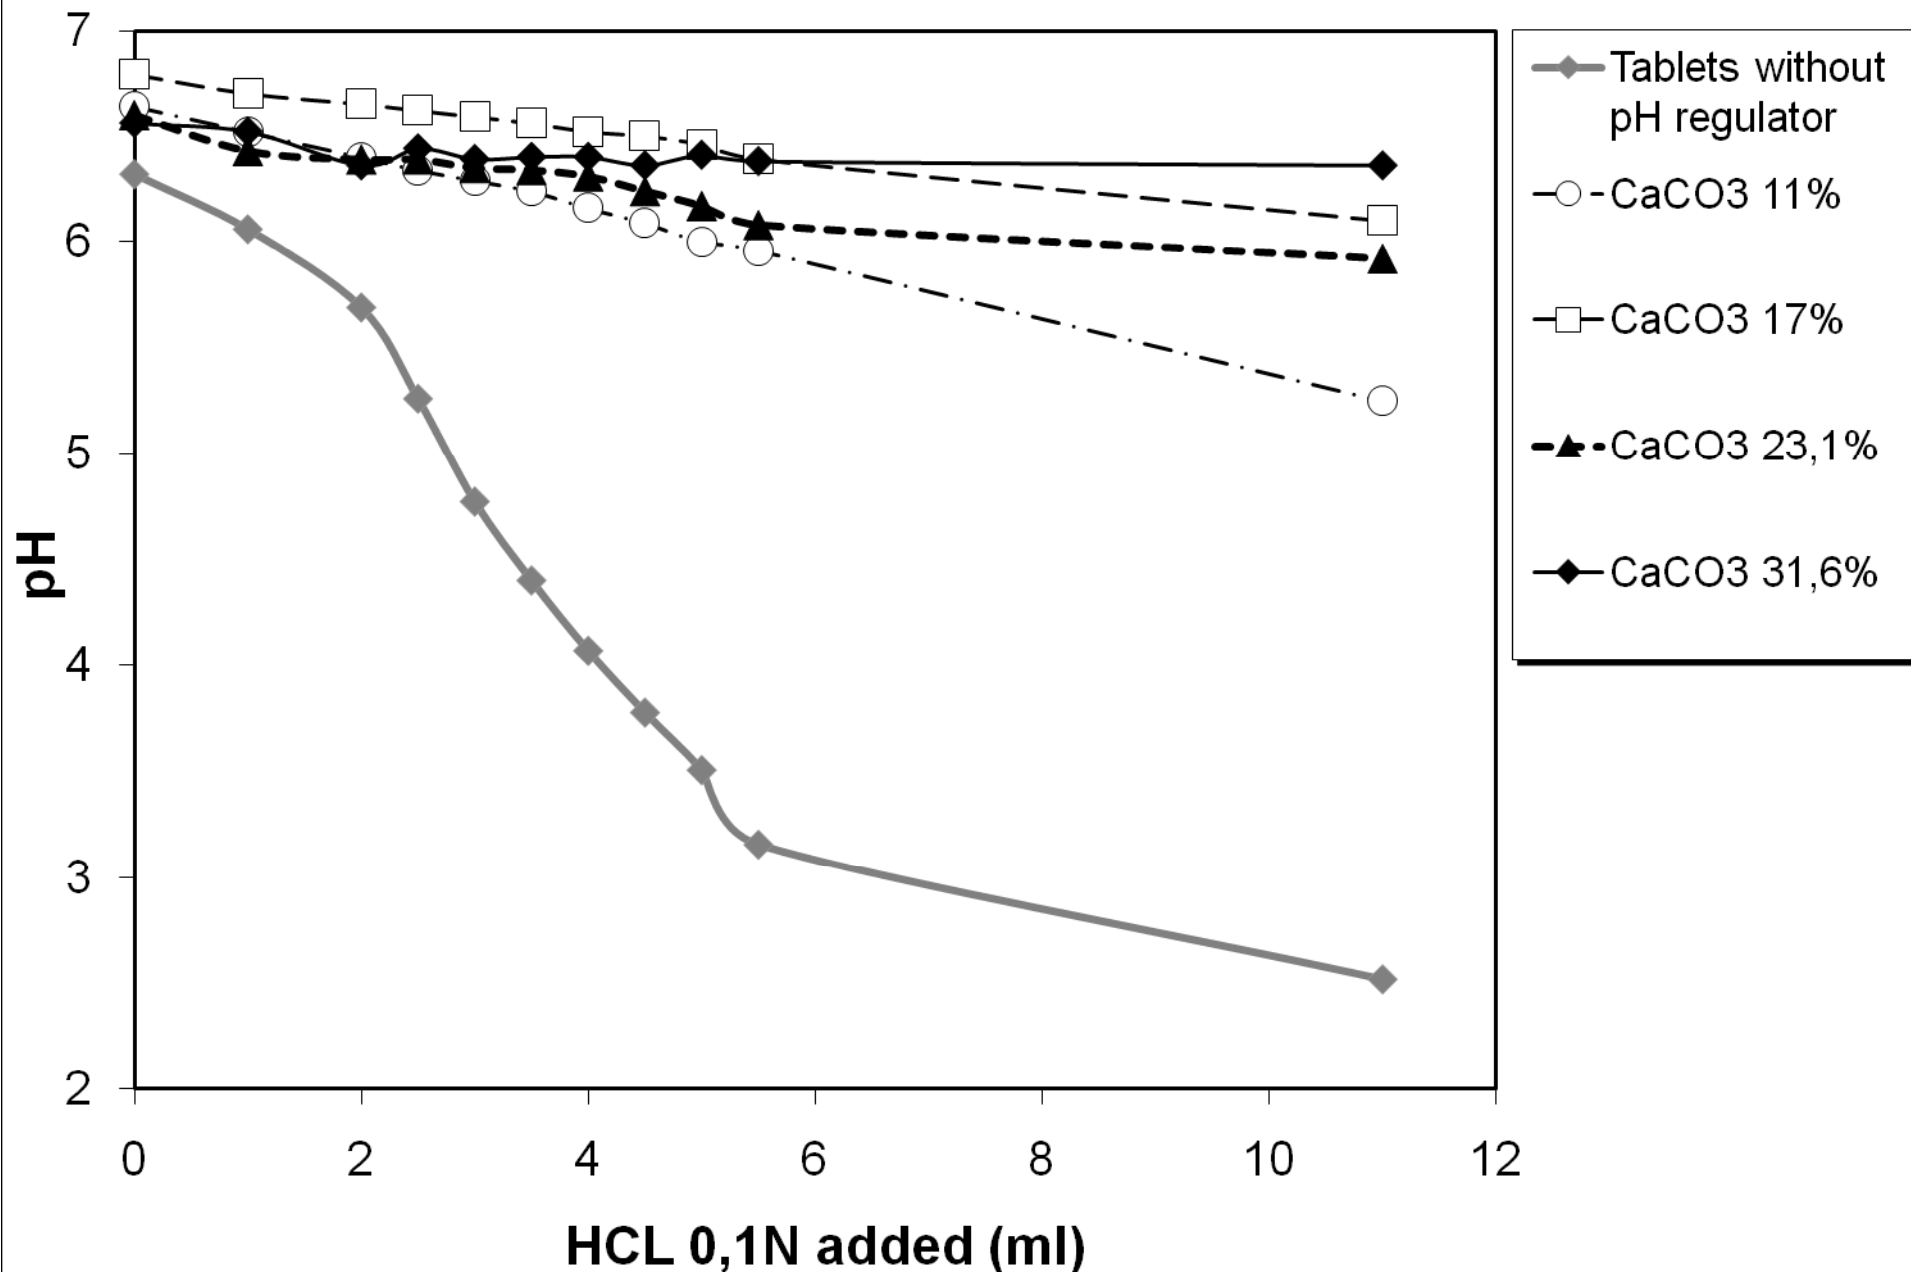

Supplement: MOESM3 [file 9541602]
